# Supplementary material
Source: Springer Nature journal article supplement (https://www.springermedizin.de/resource/supplementary/13063_2013_1872_MOESM4_ESM.pdf/9620366)

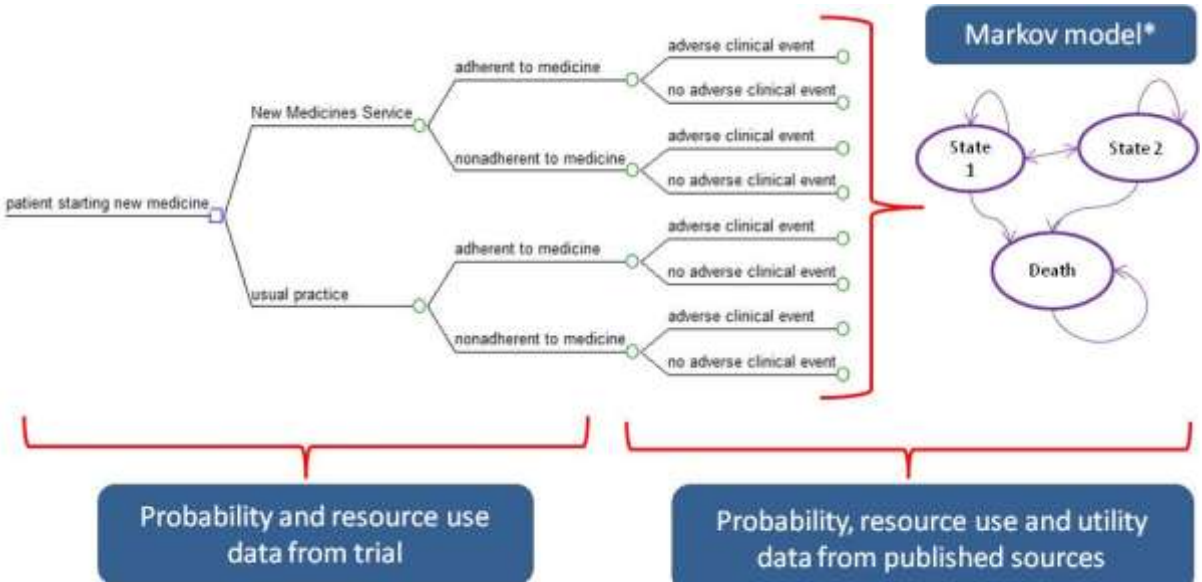

\*number and type of health states will depend on the disease/drug group

Supplement: MOESM4 [file 9620366]
